# Supplementary material
Source: Springer Nature journal article supplement (https://www.springerprofessional.de/resource/supplementary/13638_2011_296_MOESM12_ESM.pdf/11897508)
Supplement: MOESM12 [file 11897508]

Set throughput requirement in each room

Location & transmit power of original set of N access points

Receiver type

Switch off all N access points of the original set, set  $M = N$

Bubble up best access point from the set of M access points

•  $AP_{best} = AP_1$

• for  $i=2:M$ :

▪ compare  $AP_{best}$  and  $AP_i$  ...

$AP_{best}$  and  $AP_i$  both in room already covered by final set?

Y

N

default rule

$AP_{best}$  and  $AP_i$  in the same room?

Y

N

default rule

Which AP would cover the room?

both

$AP_{best}$

$AP_i$

none

default rule

$AP_{best}$

$AP_i$

Is the considered room a large isolated room?

Y

N

AP leading to lowest d avg \*

default rule

▪ ... and update  $AP_{best}$

Switch on  $AP_{best}$  and add to the set of access points, set  $M = M-1$

All coverage requirements met?

N
